# Supplementary material for: New anatase phase VTi2.6O7.2 ultrafine nanocrystals for high-performance rechargeable magnesium-based batteries
Source: Royal Society of Chemistry journal article supplement (doi:10.1039/c8ta01818a), 2018-01-01
Supplement: c8ta01818a1.pdf [file c8ta01818a1.pdf]

## Supporting Information

# New Anatase Phase $\text{VTi}_{2.6}\text{O}_{7.2}$ Ultrafine Nanocrystals for High-Performance Rechargeable Magnesium-Based Batteries

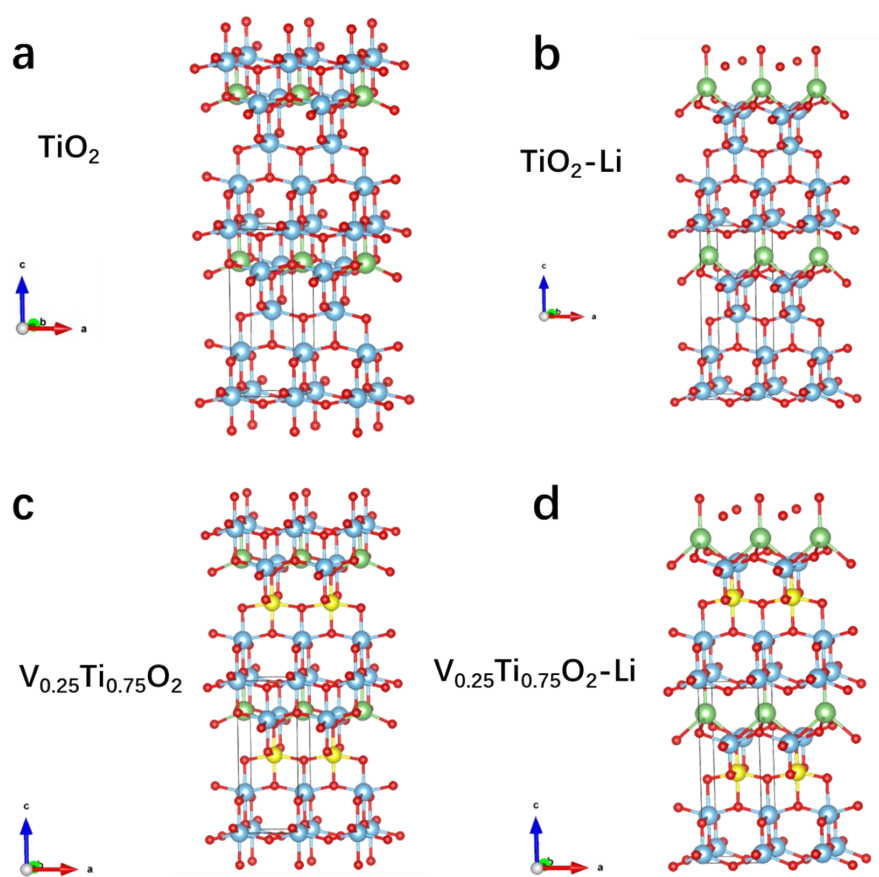

**Fig. S1** (a, b) The unit cell of anatase  $\text{TiO}_2$  before and after  $\text{Li}^+$  intercalation. (c, d) The unit cell of anatase  $\text{V}_{0.25}\text{Ti}_{0.75}\text{O}_2$  with one fourth titanium atoms replaced by vanadium atoms before and after  $\text{Li}^+$  intercalation.

## DFT calculation process

The DFT was performed within the framework of Cambridge Serial Total Energy Package plane wave code.<sup>S1-S2</sup> Ultrasoft pseudopotentials were used to describe the interaction of ionic core and valence electrons. The generalized gradient approximation of Perdew–Burke–Ernzerhof method parameterized by Perdew was used to calculate the exchange and correlation terms.<sup>S3-S4</sup> Brillouin-zone integrations were performed using Monkhorst and Pack k-point meshes.<sup>S5</sup> To calculate the intercalation energy in  $V_{0.25}Ti_{0.75}O_2$ , of, the central Ti atom in the cellular is replace with V atom. The  $Li^+$  intercalation energy ( $E_i$ ) is defined as  $E_i = E_{Li+V} - E_{Li} - E_V$ , where  $E_{Li+V}$  and  $E_V$  are total energies of intercalated  $Li^+$  and pristine VTO unit cell respectively, while  $E_{Li}$  is the energy of isolated lithium.<sup>S6</sup>

S 1 W. Kohn, L. J. Sham, *Phys. Rev.*, 1965, **140**, 1133.

S 2 V. Milman, B. Winkler, J. White, C. Pickard, M. Payne, E. Akhmatkaya, R. Nobes, *Int. J. Quantum Chem.*, 2000, **77**, 895.

S 3 M. Marlo, V. Milman, *Phys. Rev. B*, 2000, **62**, 2899.

S 4 J. White, D. Bird, *Phys. Rev. B*, 1994, **50**, 4954.

S 5 J. D. Pack, H. J. Monkhorst, *Phys. Rev. B*, 1977, **16**, 1748.

S 6 P. M. Harris, E. Mack Jr., F. Blake, *J. Am. Chem. Soc.*, 1928, **50**, 1583.

**Table S1** The calculations of intercalation energy and volume expand after Li<sup>+</sup> intercalating into TiO<sub>2</sub> and V<sub>0.25</sub>Ti<sub>0.75</sub>O<sub>2</sub> crystal lattice by the DFT results.

|                                                         | Energy    | Intercalation energy | Volume | Volume expand |
|---------------------------------------------------------|-----------|----------------------|--------|---------------|
| TiO <sub>2</sub>                                        | -107.7034 | /                    | 140.14 | /             |
| TiO <sub>2</sub> -Li                                    | -109.0828 | -1.3794              | 155.56 | 11.00%        |
| V <sub>0.25</sub> Ti <sub>0.75</sub> O <sub>2</sub>     | -106.1338 | /                    | 137.42 | /             |
| V <sub>0.25</sub> Ti <sub>0.75</sub> O <sub>2</sub> -Li | -107.8681 | -1.7343              | 150.13 | 9.25%         |

**Table S2** Lattice constants and Rietveld refinement results of VTi<sub>2.6</sub>O<sub>7.2</sub>

|                        |         |
|------------------------|---------|
| GOF                    | 0.86    |
| a (Å)                  | 3.79959 |
| b (Å)                  | 3.79959 |
| c (Å)                  | 9.51160 |
| R <sub>exp</sub>       | 1.36    |
| R <sub>wp</sub>        | 1.18    |
| R <sub>p</sub>         | 0.90    |
| R <sub>exp</sub> -dash | 14.85   |
| R <sub>wp</sub> -dash  | 12.83   |
| R <sub>p</sub> -dash   | 20.25   |
| Weighted Durbin Watson | 0.16    |

**Table S3** Refined peak list of VTi<sub>2.6</sub>O<sub>7.2</sub>

| No. | h | k | l | m | d       | th2      | F <sup>2</sup> |
|-----|---|---|---|---|---------|----------|----------------|
| 1   | 0 | 1 | 1 | 8 | 3.52847 | 25.21948 | 204.407        |
| 2   | 0 | 1 | 3 | 8 | 2.43434 | 36.89426 | 23.688         |
| 3   | 0 | 0 | 4 | 2 | 2.3779  | 37.80278 | 84.314         |
| 4   | 1 | 1 | 2 | 8 | 2.33924 | 38.45193 | 37.476         |
| 5   | 0 | 2 | 0 | 4 | 1.89979 | 47.84044 | 218.303        |
| 6   | 0 | 2 | 2 | 8 | 1.76424 | 51.77663 | 0              |

---

|    |   |   |    |    |         |          |         |
|----|---|---|----|----|---------|----------|---------|
| 7  | 0 | 1 | 5  | 8  | 1.70103 | 53.85221 | 180.764 |
| 8  | 2 | 1 | 1  | 16 | 1.67274 | 54.83873 | 186.413 |
| 9  | 2 | 1 | 3  | 16 | 1.49769 | 61.90451 | 34.74   |
| 10 | 0 | 2 | 4  | 8  | 1.48426 | 62.5275  | 169.788 |
| 11 | 1 | 1 | 6  | 8  | 1.36532 | 68.69204 | 114.154 |
| 12 | 2 | 2 | 0  | 4  | 1.34336 | 69.97713 | 113.246 |
| 13 | 0 | 1 | 7  | 8  | 1.27945 | 74.03453 | 10.994  |
| 14 | 2 | 1 | 5  | 16 | 1.26728 | 74.86658 | 197.158 |
| 15 | 0 | 3 | 1  | 8  | 1.25545 | 75.69537 | 54.005  |
| 16 | 0 | 2 | 6  | 8  | 1.21717 | 78.52272 | 0       |
| 17 | 0 | 0 | 8  | 2  | 1.18895 | 80.76402 | 7.404   |
| 18 | 0 | 3 | 3  | 8  | 1.17616 | 81.82831 | 12.583  |
| 19 | 2 | 2 | 4  | 8  | 1.16962 | 82.38474 | 102.328 |
| 20 | 3 | 1 | 2  | 16 | 1.16493 | 82.78892 | 43.448  |
| 21 | 3 | 1 | 4  | 16 | 1.07241 | 91.82695 | 0       |
| 22 | 2 | 1 | 7  | 16 | 1.06122 | 93.08081 | 16.685  |
| 23 | 0 | 3 | 5  | 8  | 1.05425 | 93.88389 | 62.283  |
| 24 | 3 | 2 | 1  | 16 | 1.04741 | 94.68773 | 70.688  |
| 25 | 0 | 1 | 9  | 8  | 1.01819 | 98.31941 | 39.887  |
| 26 | 0 | 2 | 8  | 8  | 1.00785 | 99.68907 | 21.642  |
| 27 | 3 | 2 | 3  | 16 | 1.00002 | 100.7581 | 18.694  |
| 28 | 3 | 1 | 6  | 16 | 0.95757 | 107.111  | 101.078 |
| 29 | 0 | 4 | 0  | 4  | 0.9499  | 108.3735 | 47.274  |
| 30 | 0 | 4 | 2  | 8  | 0.9315  | 111.5725 | 0       |
| 31 | 0 | 3 | 7  | 8  | 0.92648 | 112.4915 | 6.446   |
| 32 | 3 | 2 | 5  | 16 | 0.92182 | 113.3619 | 86.594  |
| 33 | 4 | 1 | 1  | 16 | 0.91724 | 114.238  | 50.221  |
| 34 | 2 | 1 | 9  | 16 | 0.89743 | 118.2613 | 57.003  |
| 35 | 1 | 1 | 10 | 8  | 0.89663 | 118.4322 | 78.984  |
| 36 | 2 | 2 | 8  | 8  | 0.89032 | 119.8086 | 16.464  |
| 37 | 4 | 1 | 3  | 16 | 0.88491 | 121.0285 | 14.368  |
| 38 | 0 | 4 | 4  | 8  | 0.88212 | 121.6739 | 49.795  |
| 39 | 3 | 3 | 2  | 8  | 0.8801  | 122.1461 | 12.71   |
| 40 | 0 | 2 | 10 | 8  | 0.85052 | 129.8306 | 0       |
| 41 | 4 | 2 | 0  | 8  | 0.84961 | 130.0917 | 69.074  |
| 42 | 3 | 1 | 8  | 16 | 0.84513 | 131.4148 | 0       |
| 43 | 0 | 1 | 11 | 8  | 0.84313 | 132.0191 | 16.117  |
| 44 | 4 | 2 | 2  | 16 | 0.83637 | 134.1453 | 0       |

---

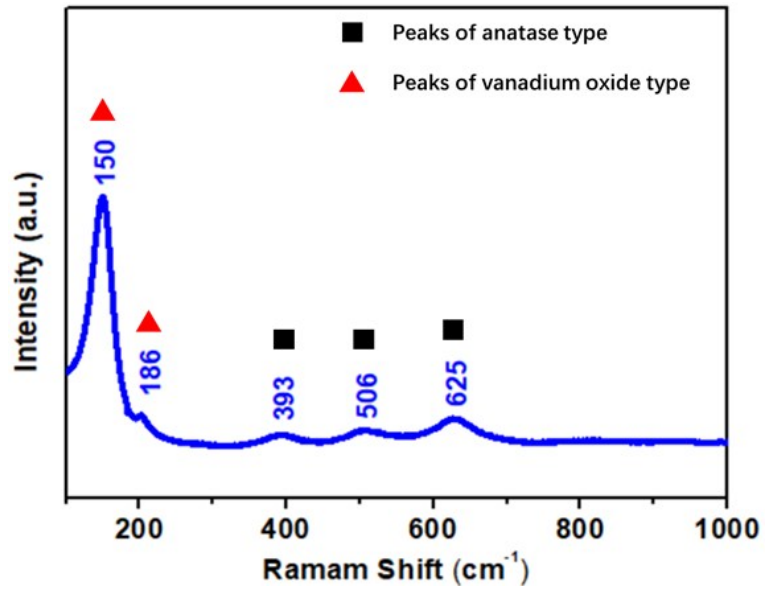

**Fig. S2** Raman spectrum of  $\text{VTi}_{2.6}\text{O}_{7.2}$ .

**Equation S1**

$$C = \frac{\frac{1}{3.6} \times n \times F}{M}$$

C ---- Specific capacity;

n ---- Transfer electronic number in a molecular;

F ---- Faraday constant;

M ---- The molecular weight

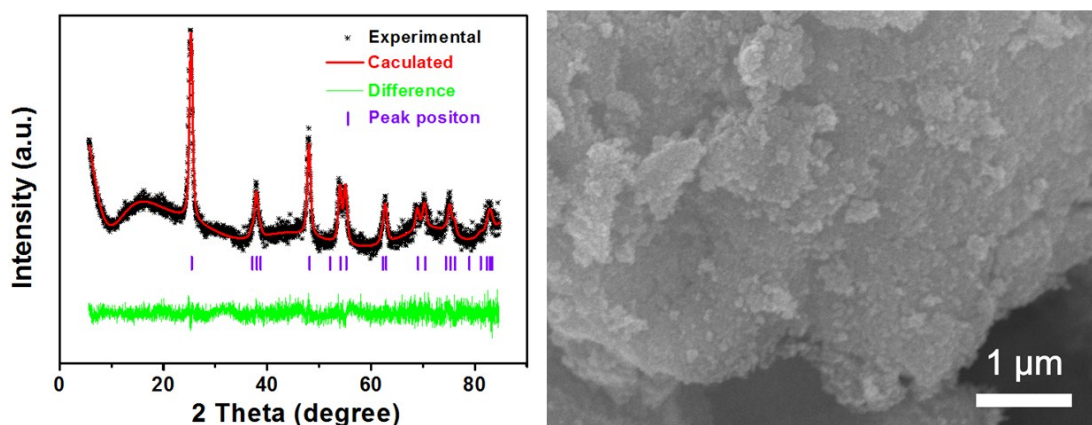

**Fig. S3** (a) The Rietveld plot for the refined TiO<sub>2</sub> XRD pattern. (b) SEM image of the as prepared TiO<sub>2</sub>.

**Table S4 Lattice constants and Rietveld refinement results for TiO<sub>2</sub>**

|                        |         |
|------------------------|---------|
| GOF                    | 0.78    |
| R <sub>exp</sub>       | 7.33    |
| a (Å)                  | 3.78489 |
| b (Å)                  | 3.78489 |
| c (Å)                  | 9.48892 |
| R <sub>wp</sub>        | 5.73    |
| R <sub>p</sub>         | 4.27    |
| R <sub>exp-dash</sub>  | 32.48   |
| R <sub>wp-dash</sub>   | 25.37   |
| R <sub>p-dash</sub>    | 23.89   |
| Weighted Durbin Watson | 0.29    |

**Table S5 Refined peak list for TiO<sub>2</sub>**

| No. | h | k | l | m | d       | th2      | F <sup>2</sup> |
|-----|---|---|---|---|---------|----------|----------------|
| 1   | 0 | 1 | 1 | 8 | 3.51554 | 25.31378 | 53.36          |
| 2   | 0 | 1 | 3 | 8 | 2.42705 | 37.00908 | 7.995          |
| 3   | 0 | 0 | 4 | 2 | 2.37223 | 37.89657 | 25.609         |
| 4   | 1 | 1 | 2 | 8 | 2.33103 | 38.59273 | 10.295         |
| 5   | 0 | 2 | 0 | 4 | 1.89244 | 48.03791 | 61.084         |
| 6   | 0 | 2 | 2 | 8 | 1.75777 | 51.98127 | 0              |
| 7   | 0 | 1 | 5 | 8 | 1.69647 | 54.0088  | 50.63          |

|    |   |   |   |    |         |          |        |
|----|---|---|---|----|---------|----------|--------|
| 8  | 2 | 1 | 1 | 16 | 1.66635 | 55.06697 | 52.818 |
| 9  | 2 | 1 | 3 | 16 | 1.49239 | 62.14867 | 12.33  |
| 10 | 0 | 2 | 4 | 8  | 1.47937 | 62.75737 | 55.02  |
| 11 | 1 | 1 | 6 | 8  | 1.36154 | 68.90955 | 29.94  |
| 12 | 2 | 2 | 0 | 4  | 1.33816 | 70.28891 | 34.131 |
| 13 | 0 | 1 | 7 | 8  | 1.27618 | 74.25584 | 3.361  |
| 14 | 2 | 1 | 5 | 16 | 1.26321 | 75.14938 | 59.599 |
| 15 | 0 | 3 | 1 | 8  | 1.25062 | 76.03925 | 16.64  |
| 16 | 0 | 2 | 6 | 8  | 1.21353 | 78.80431 | 0      |
| 17 | 0 | 0 | 8 | 2  | 1.18612 | 80.99716 | 3.261  |
| 18 | 0 | 3 | 3 | 8  | 1.17185 | 82.19409 | 4.821  |
| 19 | 2 | 2 | 4 | 8  | 1.16551 | 82.73849 | 35.686 |
| 20 | 3 | 1 | 2 | 16 | 1.16053 | 83.1727  | 14.885 |

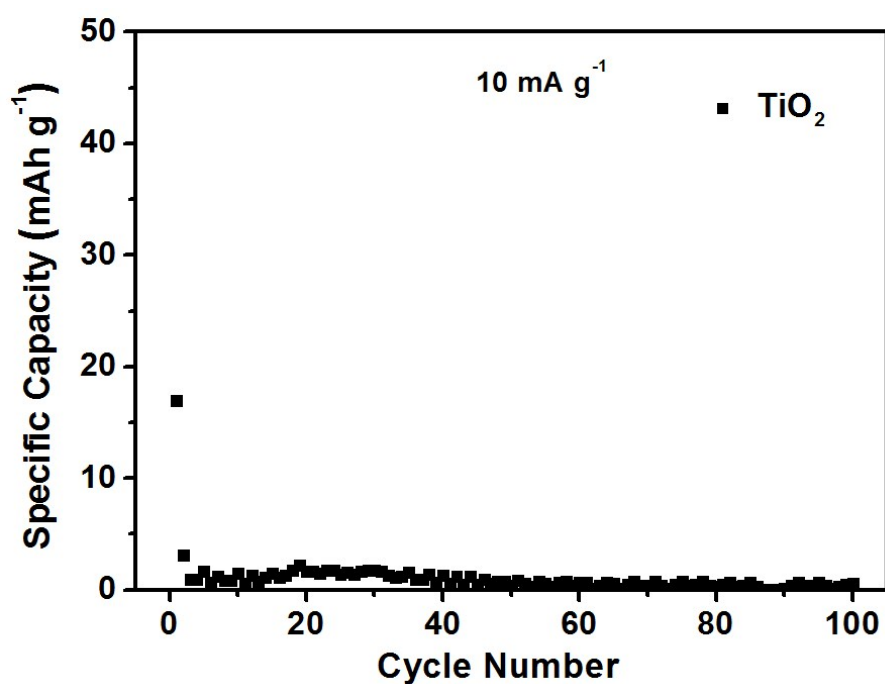

**Fig. S4** Cycling performance of the as prepared TiO<sub>2</sub> in MBs at 10 mA g<sup>-1</sup>.

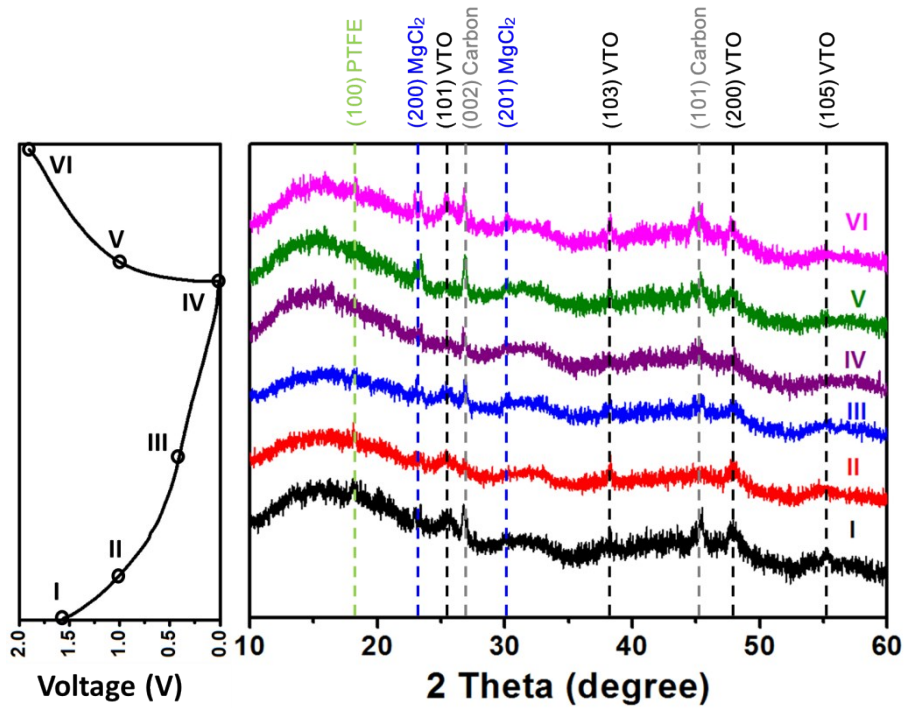

**Fig. S5** Ex situ XRD measurement of VTO in MBs.

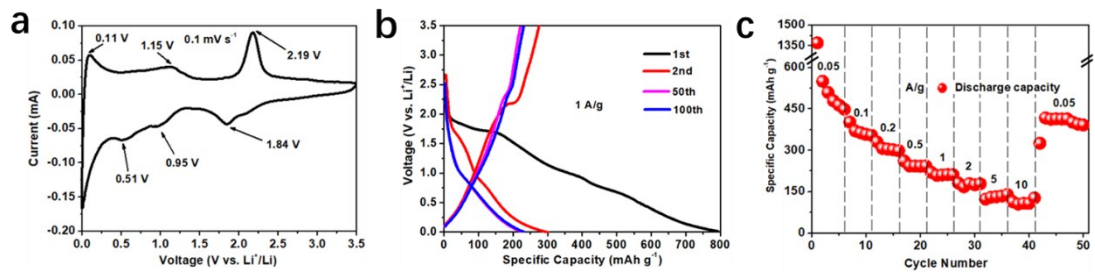

**Fig. S6** Electrochemical performance of  $\text{VTi}_{2.6}\text{O}_{7.2}$  in LIBs. (a) Cyclic voltammogram curve of LIBs (scan rate,  $0.1 \text{ mV s}^{-1}$ ). (b) Charge-discharge curves of different cycles at  $1 \text{ A g}^{-1}$  in the voltage window of  $0.01\text{-}3.5 \text{ V}$ . (c) Rate performances.



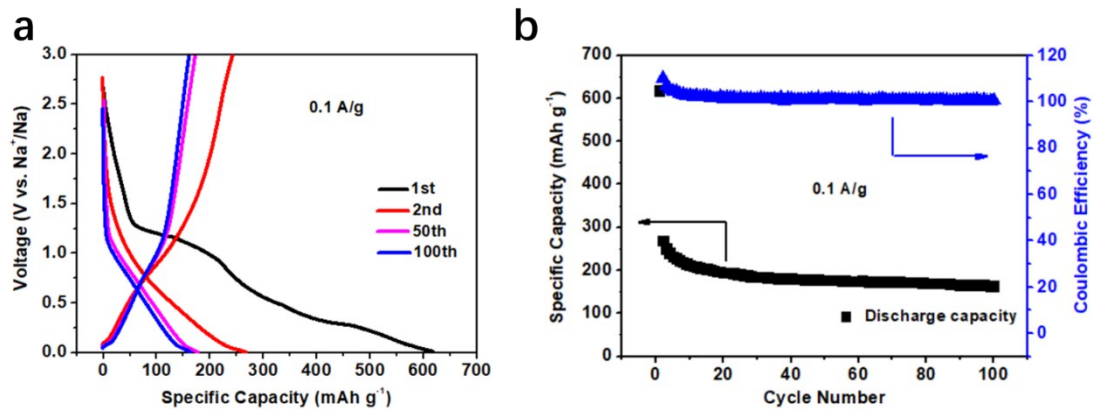

**Fig. S7** Electrochemical performance of  $\text{VTi}_{2.6}\text{O}_{7.2}$  in SIBs. (a) Charge-discharge curves of different cycles at  $0.1 \text{ A g}^{-1}$  in the voltage window of 0.01-3 V. (b) Cycling performance at  $0.1 \text{ A g}^{-1}$ .

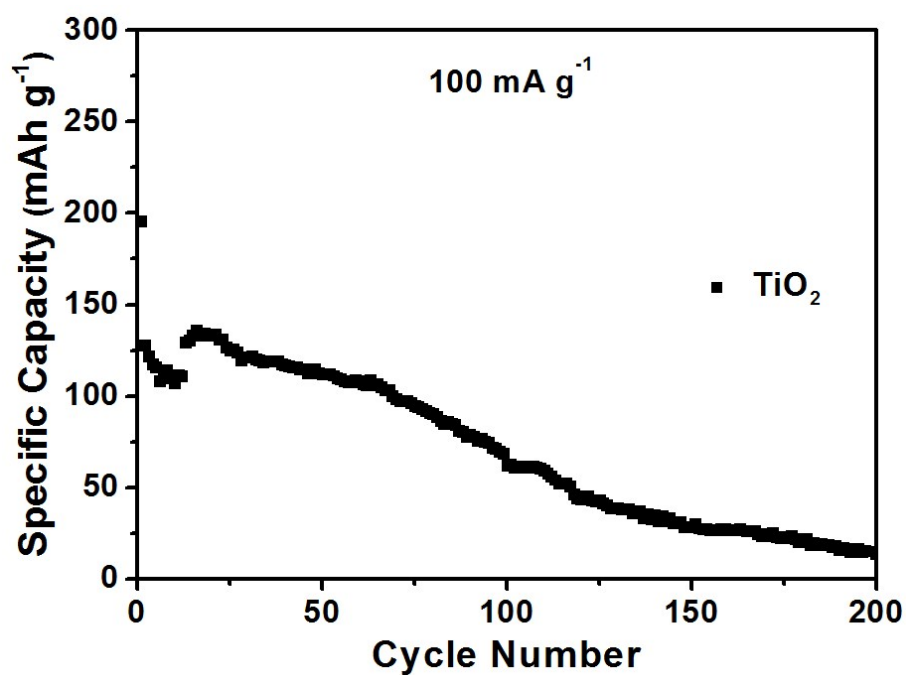

**Fig. S8** Cycling performance of the as prepared  $\text{TiO}_2$  in MLHBs at  $100 \text{ mA g}^{-1}$ .

**Table S6** Comparison of the reported different cathode materials in specific energy density for coin-type batteries.

| Cathode materials                               | Electrolyte                                                                     | Voltage window (V) | Current density (mA/g) | Discharged capacity (mA h/g) | Average Working voltage (V) | Specific energy density (Wh/kg) | Ref.      |
|-------------------------------------------------|---------------------------------------------------------------------------------|--------------------|------------------------|------------------------------|-----------------------------|---------------------------------|-----------|
| TiO <sub>2</sub> (B)                            | 0.5 mol/L Mg(BH <sub>4</sub> ) <sub>2</sub> + 1.5 mol/ L LiBH <sub>4</sub> /TG  | 0.5-1.7            | 33.5                   | 180                          | ~0.7 V                      | 126                             | 13        |
| TiO <sub>2</sub> (B)                            | 0.4 M LiCl in 0.4 M APC/THF                                                     | 0.01-2             | 20                     | 236                          | ~0.75 V                     | 177                             | 14        |
| VO <sub>2</sub>                                 | 1M LiCl in 0.25 M APC/THF                                                       | 0.5-2              | 20                     | 244.4                        | 1.75                        | 427                             | 15        |
| TiS <sub>2</sub>                                | 0.4 M LiCl in 0.4 M APC/THF                                                     | 0.5-2              | 24                     | 161                          | 1.3                         | 209.3                           | 16        |
| TiS <sub>2</sub>                                | 0.5 M LiCl in 0.25 M APC/THF                                                    | 0.5-2              | 24.1                   | 220                          | 1.4                         | 308                             | 17        |
| FeS                                             | 1.5 M LiBH <sub>4</sub> in 0.1 M Mg(BH <sub>4</sub> ) <sub>2</sub>              | 0.1-1.7            | 60.9                   | 458                          | 0.7                         | 320.6                           | 18        |
| FeS <sub>2</sub>                                | 1.5 M LiBH <sub>4</sub> in 0.1 M Mg(BH <sub>4</sub> ) <sub>2</sub>              | 0.1-1.7            | 89.4                   | 566                          | 0.7                         | 396.2                           | 18        |
| Li <sub>4</sub> Ti <sub>5</sub> O <sub>12</sub> | 0.5 M LiCl in 0.25 M Mg(AlCl <sub>2</sub> BuEt <sub>2</sub> ) <sub>2</sub> /THF | 0-1.8              | 60                     | 175                          | 0.5                         | 87.5                            | 39        |
| Mo <sub>6</sub> S <sub>8</sub>                  | 0.5 M LiCl in 0.2 M APC/THF                                                     | 0.5-1.7            | 30.5                   | 120                          | 1.28                        | 153.6                           | 51        |
| Mo <sub>6</sub> S <sub>8</sub>                  | 1 M LiCl in 0.4 M APC/THF                                                       | 0.5-2              | 12.3                   | 126                          | 1.3                         | 163.8                           | 52        |
| MoS <sub>2</sub>                                | 0.5 M LiCl in APC/THF                                                           | 0.1-1.8            | 25                     | 160                          | ~0.95                       | 152                             | 53        |
| MoO <sub>2</sub>                                | 1 M LiCl in 0.4 M APC/THF                                                       | 0.5-2              | 20                     | 191                          | 0.75                        | 143.3                           | 54        |
| LiCrTiO <sub>4</sub>                            | 1 M LiCl in 0.3 M APC/THF                                                       | 0.01-1.8           | 20                     | 178                          | ~0.66                       | 117.5                           | 55        |
| VTi <sub>2.6</sub> O <sub>7.2</sub>             | 1M LiCl in 0.25 M APC/THF                                                       | 0.01-1.9           | 100                    | 265.2                        | ~1                          | 265.5                           | This work |
